# A Comparison of Different Methods of Temperature Measurements in Sick Newborns

by Sinan Uslu,<sup>1,2</sup> Hamus Ozdemir,<sup>2</sup> Ali Bulbul,<sup>1</sup> Serdar Comert,<sup>1</sup> Fatih Bolat,<sup>1</sup> Emrah Can,<sup>1</sup> and Asiye Nuhoglu<sup>1</sup>

<sup>1</sup>Department of Pediatrics, Division of Neonatology, Sisli Etfal Children Hospital, Istanbul, Turkey

<sup>2</sup>Department of Pediatrics, Division of Neonatology, Diyarbakir Children Hospital, Diyarbakir, Turkey

Correspondence: Sinan Uslu, Department of Pediatrics, Division of Neonatology, Darusafaka mah. Acelya sok. Yonca sit. 1B blok D:9 Istinye, 34460, Istanbul, Turkey; Sisli Etfal Children Hospital, Halaskargazi Cad. Sisli, 34360, Istanbul, Turkey. Tel: +90 532 737 00 15, Fax: +90 212 234 11 21. E-mail: <sinanushumd@hotmail.com>.

## Summary

We aimed to compare the accuracy of digital axillary thermometer (DAT), rectal glass mercury thermometer (RGMT), infrared tympanic thermometer (ITT) and infrared forehead skin thermometer (IFST) measurements with traditional axillary glass mercury thermometer (AGMT) for intermittent temperature measurement in sick newborns. A prospective, descriptive and comparative study in which five different types of thermometer readings were performed sequentially for 3 days. A total of 1989 measurements were collected from 663 newborns. DAT and ITT measurements correlated most closely to AGMT ( $r = 0.94$ ). The correlation coefficient for IFST and RGMT were 0.74 and 0.87, respectively. The mean differences for DAT, ITT, RGMT and IFST were  $+0.02^{\circ}\text{C}$ ,  $+0.03^{\circ}\text{C}$ ,  $+0.25^{\circ}\text{C}$  and  $+0.55^{\circ}\text{C}$ , respectively. There were not any clinical differences (defined as a mean difference of  $0.2^{\circ}\text{C}$ ) between both mean AGMT&DAT and AGMT&ITT measurements. Our study suggests that tympanic thermometer measurement could be used as an acceptable and practical method for sick newborn in neonatal units.

**Key words:** Temperature, newborn, thermometers, axillary, rectal, tympanic, digital, infrared.

## Introduction

Maintenance and monitoring of the thermoregulation of newborn infants is a basic requirement of good neonatal management and play a key role for neonatal nursing care in the neonatal intensive care unit (NICU). Determining accurate measurement of temperature is very important because abnormal temperature is strongly associated with a serious condition [1, 2]. Temperature of newborns may be measured in a variety of sites, including rectum, tympanic membrane, forehead and axilla and using a number of different tools, including glass mercury, digital, electronic and infrared thermometers.

Temperature measurement by the axillary method has become the accepted neonatal nursing care [3, 4]. Because of the greater surface vasculature, increased body fat and thermal uniformity, temperature measured in the axillary area is considered reliable and is used as a standard measurement site in newborns. No significant differences have been noted between left and right axillae [5].

Glass mercury thermometers are historically the most acceptable standard methods of temperature measurement. However, glass mercury thermometers has some disadvantages such as danger of breakage,

potential harm and toxic vapor effects to health workers and the patients. Therefore, glass mercury thermometers are now used rarely in developed countries and studies are conducted to understand the efficacy of the various types of equipment available to measure temperature [6].

The aim of this study was to compare the accuracy of digital axillary thermometer (DAT), rectal glass mercury thermometer (RGMT), infrared tympanic thermometer (ITT) and infrared forehead skin thermometer (IFST) measurements with traditional axillary glass mercury thermometer (AGMT) for intermittent temperature measurement in the NICU.

## Methods

This study was performed between 1 December 2008 and 1 April 2009 in the NICU of the Diyarbakir Children Hospital, in Turkey. During the study period, the newborns who were hospitalized in NICU of the Diyarbakir Children Hospital, were included in the study. The patients with unstable conditions such as dysmorphic appearance, congenital anomaly, septic shock and circulatory problem that would effect measurement were excluded from the trial. This was a prospective, descriptive and

comparative study in which three temperature readings were performed sequentially 3 days from each newborn in incubator by the same neonatal nurse. A health worker helped the nurse for stabilization of the patients. Prior to the onset of data collection, the data collector nurse was instructed for correct temperature measurements procedures utilizing the five methods. An oral informed and written consent were obtained from the parents of the infants.

Temperature was measured using the following: glass mercury thermometer (for axillary and rectal tools separately), digital thermometer (Microlife digital thermometer, model MT 3001, Microlife AG Swiss Corp., Widnay, Switz), tympanic thermometer (First Temp Genius, Tyco Healthcare Kendall, Mansfield, Massachusetts) with disposable probe covers and infrared skin thermometer (Thermoflash LX-26, Visiomed France, Mountreuil, France).

The glass mercury thermometers and the tympanic thermometer were supplied by hospital's central service. The infrared skin thermometers and digital thermometers were provided by the authors of the study. The glass mercury thermometer (GMT) and digital thermometer were used separately for each patients.

Bilateral axillae were utilized for glass and digital thermometers, and right ear was chosen for tympanic thermometer. Infrared skin temperature was obtained on the central part of forehead. Axillary and forehead region were dried using a towel before the measurement. The GMT was shaken before using in order to decrease the reading below 35°C. Infrared skin thermometer was put in incubator or it was kept at room temperature for 15 min before using. First, digital and glass mercury thermometers were randomly placed in bilateral axillas separately in supine position at the same time. Patients were stabilized by a health worker. Simultaneously tympanic thermometer was inserted into the right external auditory canal by pulling the pinna straight back and the probe was directed toward the eye. The prob was held in the ear canal until a beep was heard. After this procedure according to principles and precautions of manufacturer, infrared skin thermometer readings were recorded three times by placing the device approximately 5–15 cm above forehead skin (mean value was accepted). Immediately after IFST measurement, a rectal glass thermometer was inserted upwards to a depth of 3 cm in a term and 2 cm in a preterm baby.

All the temperature measurements were recorded in the morning between hours of 08:00 till 12:00 during the study period. The room air temperature and relative humidity were kept constantly at 22–26°C and a relative humidity of 30–60%, respectively [7]. The temperatures of the incubators were adjusted according to the standard temperature recommendations based on gestational age [8]. All readings were done by celcius (°C) scale. A time of

3 min was needed for axillary and 2 min for rectal thermometer, approximately 1–3 min with digital thermometer, 3 s with tympanic thermometer and 1 s with infrared skin thermometer. All measurements were terminated nearly at 8–10 min.

Five temperature measurements were obtained by data collector for each sample. Data analysis included Pearson's *r* coefficients (to determine the strength of the correlation), paired *t*-tests (to determine statistically significant difference), standard deviation, mean and range using SPSS statistical package. Scatter plot method was used in order to compare axillary glass thermometer with every other devices. Clinical significance was defined as a mean difference of 0.2°C between axillary glass temperature and other four measurements [9].

## Results

During the study period, 742 patients were hospitalized in the NICU. Seventy nine neonates who met the exclusion criteria were not included in the trial. Six hundred sixty-three newborn infants were included in this study and 1989 measurements of data were used during statistical analysis. Three hundred and forty-one of them were males (51.4%) and the average gestational age, birth weights and post-natal age during the study period were  $36 \pm 3.6$  weeks,  $2468 \pm 11$  g and  $11 \pm 7.4$  days, respectively. Among the babies in the study group, 305 (46%) were preterm whereas 358 (54%) term. The study group did not include any postmature baby. Among the babies, 319 (48.1%) were found to be low birth weight (LBW) (<2500 g) whereas 344 (51.9%) had a birth weight  $\geq 2500$  g. The temperature values of the patients and mean differences according to gestational age (preterm and term) and birth weight (<2500 g and  $\geq 2500$  g) were summarized in Table 1. When all methods of temperature measurement were taken into consideration, any clinical difference which was defined as a mean difference of 0.2°C was not observed between patients regarding gestational age and birth weight. The hospitalization etiologies of patients in the study group were shown in Table 2.

The correlation between five methods were given in Table 3. DAT and ITT measurements correlated most closely to AGMT ( $r=0.94$ ). The correlation coefficient for IFST and RGMT were 0.74 and 0.87, respectively. The comparison of measurement of DAT, IFST, RGMT and ITT with AGMT were shown in Figs 1–4, respectively. The comparison of the temperature readings done by AGMT and DAT, and AGMT and ITT is seen in Figs 1 and 2, respectively. A significant correlation was found between comparable methods (Fig. 1,  $R_{sq}$  0.886, Fig. 2,  $R_{sq}$  0.885). The comparison of AGMT and RGMT temperature measurements were shown in Fig. 3. There is good correlation between these methods (Fig. 3,

TABLE 1  
The temperature measurement of the patients according to gestational age (preterm and term) and birth weight (<2500 g and ≥2500 g)

| Types of Thermometer <sup>a</sup> | Gestational age          |                       | Mean difference <sup>b</sup> | Birthweight       |                   | Mean difference <sup>b</sup> |
|-----------------------------------|--------------------------|-----------------------|------------------------------|-------------------|-------------------|------------------------------|
|                                   | Preterm babies (n = 305) | Term babies (n = 358) |                              | <2500 g (n = 319) | ≥2500 g (n = 344) |                              |
| AGMT                              | 36.71 ± 0.41             | 36.76 ± 0.41          | −0.05                        | 36.70 ± 0.40      | 36.77 ± 0.41      | −0.07                        |
| DAT                               | 36.72 ± 0.41             | 36.77 ± 0.40          | −0.05                        | 36.72 ± 0.40      | 36.78 ± 0.41      | −0.06                        |
| ITT                               | 36.73 ± 0.41             | 36.78 ± 0.41          | −0.05                        | 36.72 ± 0.41      | 36.80 ± 0.41      | −0.08                        |
| RGMT                              | 36.94 ± 0.42             | 36.98 ± 0.41          | −0.04                        | 36.94 ± 0.41      | 36.99 ± 0.42      | −0.05                        |
| IFST                              | 37.21 ± 0.47             | 37.24 ± 0.48          | −0.03                        | 37.21 ± 0.48      | 37.23 ± 0.48      | −0.02                        |

<sup>a</sup>Values were given as mean ± SD by celcius (°C) scale.

<sup>b</sup>There were no clinical differences (defined as a mean difference of 0.2°C) between patients according to gestational age (preterm and term) and birth weight (<2500 g and ≥2500 g).

TABLE 2  
The hospitalization etiologies of patients in the study group

| Etiologies           | Infants (n = 663) n (%) |
|----------------------|-------------------------|
| Respiratory diseases | 273 (41.2)              |
| Perinatal asphyxia   | 109 (16.4)              |
| Sepsis               | 91 (13.7)               |
| Prematurity          | 78 (11.8)               |
| Hyperbilirubinemia   | 41 (6.2)                |
| Surgical diseases    | 23 (3.5)                |
| Other diseases       | 48 (7.2)                |

TABLE 3  
Correlation coefficients for temperature measurements between axillary glass thermometer and other four methods

| Types of Thermometer | Pearson's correlation coefficients |
|----------------------|------------------------------------|
| AGMT                 | 1.0000                             |
| DAT                  | 0.94                               |
| ITT                  | 0.94                               |
| RGMT                 | 0.87                               |
| IFST                 | 0.74                               |

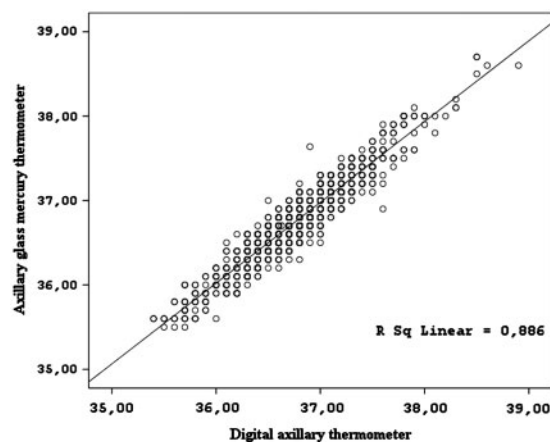

FIG. 1. Scatter plot of the difference between temperatures measured by AGMT and DAT.

Rsq 0.758). Poor correlation between AGMT and IFST temperature measurements is seen Fig. 4 (Rsq 0.596).

The mean temperature measurements were given in Table 4. The DAT had the smallest range

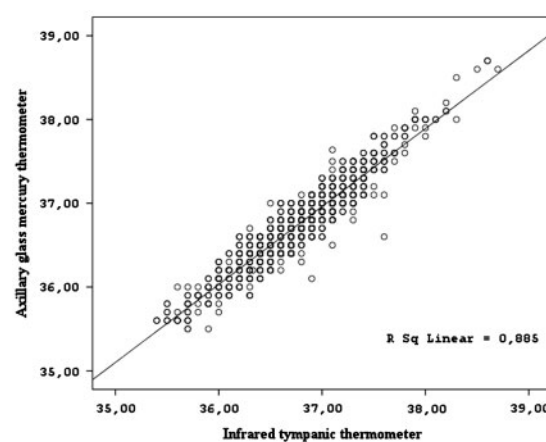

FIG. 2. Scatter plot of the difference between temperatures measured by AGMT and ITT.

(35.4–38.6°C). The IFST had the widest range (35.9–39.6°C). Mean AGMT measurement (36.74 ± 0.41°C) was compared with DAT (36.75 ± 0.40°C), ITT (36.76 ± 0.42°C), RGMT (36.97 ± 0.42°C) and

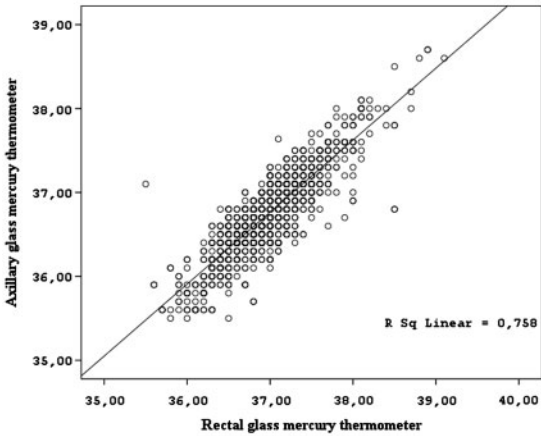

FIG. 3. Scatter plot of the difference between temperatures measured by AGMT and RGMT.

TABLE 4  
Measurement ranges of five methods

| Types of Thermometer | Mean (°C) | Standard deviation | Range (°C) |
|----------------------|-----------|--------------------|------------|
| AGMT                 | 36.74     | 0.41               | 35.5–38.7  |
| DAT                  | 36.75     | 0.40               | 35.4–38.6  |
| ITT                  | 36.76     | 0.42               | 35.4–38.7  |
| RGMT                 | 36.97     | 0.42               | 35.5–39.1  |
| IFST                 | 37.22     | 0.47               | 35.9–39.6  |

IFST ( $37.22 \pm 0.47^{\circ}\text{C}$ ). When we evaluated the correlation between AGMT and the other methods, the mean differences for DAT, ITT, RGMT and IFST were  $+0.02^{\circ}\text{C}$ ,  $+0.03^{\circ}\text{C}$ ,  $+0.25^{\circ}\text{C}$  and  $+0.55^{\circ}\text{C}$ , respectively. The mean differences were significant ( $p=0.001$ ,  $p=0.001$ ,  $p<0.001$ ,  $p<0.001$ , respectively). But there were no clinical differences (defined as a mean difference of  $0.2^{\circ}\text{C}$ ) between mean AGMT and DAT measurement, and mean AGMT and ITT measurement.

### Discussion

Accurate and practical temperature monitoring is essential for clinical neonatal care and time management in neonatology units. Glass mercury thermometers and axillary region have been considered the gold standard method of temperature measurement in newborns [6, 10]. Although glass mercury thermometers have been used for a long period of time, this procedure had also some important disadvantages such as danger of breakage, potential harm and toxic vapor effects; difficulties in reading the values on the device; and possible role in spread of hospital

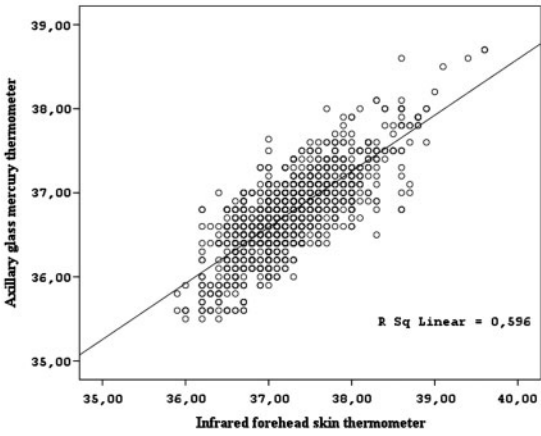

FIG. 4. Scatter plot of the difference between temperatures measured by AGMT and IFST.

acquired infections [2, 6]. Therefore, several studies have been conducted to determine the most accurate and practical device.

Digital thermometers have been shown to be a valuable method for neonatal temperature measurements. Sganga [6], Smith [11] and Leick-Rude *et al.* [12] found that the digital thermometer had a high correlation with the AGMT. In our study, the mean difference between AGMT and DAT was statistically significant, but not clinically significant. We demonstrated a good correlation between AGMT and DAT.

ITT is useful for clinical temperature measurement as long as moderately variability between patients is acceptable [13]. There are studies supporting the use of ITT among various age groups including newborns [14–16]. Weiss *et al.* [17] and Weiss [18] found that mean ear and axillary temperatures were highly correlated in newborns. However, its accuracy has been questioned for newborns in some studies [6, 19]. In our study, we found a high correlation between AGMT and ITT measurements. Although the mean difference of temperature measurements was statistically significant, a clinical significance was not found.

Rectal temperature measurement with glass mercury thermometer was reported to be the accurate method compared with the axillary measurements in newborns [20, 21]. Fulbrook *et al.* [22] stated that rectal temperatures to be consistently higher than temperatures taken at other sites possibly due to increased metabolic activity or bacteria. Hissink *et al.* [23] showed a wide variation of the mean difference between axillary and rectal temperature in newborns. In a systematic review, Craig *et al.* [24] concluded that the difference between temperature reading at the axilla and rectum using glass mercury



thermometer showed wide variation across studies. Our study had same result also. There was a statistical and clinical significance between AGMT and RGMT.

Kemp *et al.* [25] compared AGMT and infrared axillary skin temperature and found good correlation between two devices but the measurements were from the different regions. Can *et al.* [26] concluded that the noncontact infrared thermometer could not be recommended for assessment of body temperature in newborns admitted to NICU. Similarly, we found a less correlation between AGMT and IFST results. The mean difference of measurements was significant both statistically and clinically. According to our study results, IFST measurement does not seem to be suitable and accurate for sick newborns.

This study has some limitations. Measurements were performed from the different body region by the same neonatal nurse. Different body regions have separate surface vasculature, metabolic activity and body fat composition. This condition might affect the measurements of the temperature. However, Kunnel *et al.* [20] found no difference in temperatures taken rectally, femorally, from the axilla or skin. Another limitation of our study was that we did not have a true measure of core body temperature to use as a criterion standard. In the literature, esophageal or pulmonary artery temperatures are generally considered to be true measures of core body temperature [27]. But both methods are invasive procedures.

The ideal measuring device should be a noninvasive, with a rapid result, accurate and practical to use. We measured temperature using five different devices and different sites in the same baby three times to find an ideal tool. We found statistically significant differences between measurements, but concluded that the differences between AGMT and DAT or ITT seen (0.01–0.02°C) were not clinically significant. Both of them were noninvasive, but ITT had more rapid results.

### Conclusion

Good correlation with glass mercury thermometer, rapid result delivery, improved patient comfort, being an easy and noninvasive procedure and lacking the disadvantages of glass mercury thermometer are the advantages of tympanic thermometer. Our study suggests that tympanic thermometer measurement could be used as an acceptable method for sick newborns in the neonatal units.

### References

1. World Health Organization. Thermal protection of the newborn: a practical guide. World Health Organization. WHO/RHT/MSM/97.2, 1997.

2. Rosenthal HM, Leslie A. Measuring temperature of NICU patients-A comparison of three devices. *J Neonatal Nurs* 2006;12:125–9.
3. National Association of Neonatal Nurses (NANN). Neonatal thermoregulation guidelines for practice. Glenview, IL: NANN, 1997.
4. Haddock BJ, Merrow DL, Swanson MS. The falling grace of axillary temperatures. *Pediatr Nurs* 1996;22:121–5.
5. Shenep JL, Adair JR, Hughes WT, *et al.* Infrared, thermistor, and glass-mercury thermometry for measurement of body temperature in children with cancer. *Clin Pediatr* 1991;30(Suppl. 4):36–41.
6. Sganga A, Wallace R, Kiehl E, *et al.* A comparison of four methods of normal newborn temperature measurement. *MCN Am J Matern Child Nurs* 2000;25:76–9.
7. White RD. Recommended standards for the newborn ICU. *J Perinatol* 2007;27:S4–19.
8. Rutter N. Temperature control and disorders. In: Rennie JM (ed.). *Robertson's Textbook of Neonatology*, 4th edn. Philadelphia: Elsevier Churchill Livingstone, 2005; pp. 267–79.
9. Keeling EB. Thermoregulation and axillary temperature measurements in neonates: a review of the literature. *Matern Child Nurs J* 1992;20:124–40.
10. Devrim I, Kara A, Ceyhan M, *et al.* Measurement accuracy of fever by tympanic and axillary thermometry. *Pediatr Emerg Care* 2007;23:16–9.
11. Smith J. Are electronic thermometry techniques suitable alternatives to traditional mercury in glass thermometry techniques in the paediatric setting? *J Adv Nurs* 1998;28:1030–9.
12. Leick-Rude MK, Bloom LF. A comparison of temperature-taking methods in neonates. *Neonatal Netw* 1998;17:21–37.
13. Çınar ND, Filiz TM. Neonatal thermoregulation. *J Neonatal Nurs* 2006;12:69–74.
14. Kocoglu H, Goksu S, Isik M, *et al.* Infrared tympanic thermometer can accurately measure the body temperature in children in an emergency room setting. *Int J Pediatr Otorhinolaryngol* 2002;65:39–43.
15. Erickson RS, Woo TM. Accuracy of infrared ear thermometry and traditional temperature methods in young children. *Heart Lung* 1994;23:181–95.
16. Fulbrook P. Core body temperature measurement: a comparison of axilla, tympanic membrane and pulmonary artery blood temperature. *Intensive Crit Care Nurs* 1997;13:266–72.
17. Weiss ME, Poeltler D, Gocka I. Infrared tympanic thermometry for neonatal temperature assessment. *J Obstet Gynecol Neonatal Nurs* 1994;23:798–804.
18. Weiss ME. Tympanic infrared thermometry for full-term and preterm neonates. *Clin Pediatr* 1991;30(Suppl. 4):42–5.
19. Yetman RJ, Coody DK, West MS, *et al.* Comparison of temperature measurements by an aural infrared thermometer with measurements by traditional rectal and axillary techniques. *J Pediatr* 1993;122:769–73.
20. Kunnel MT, O'Brien C, Munro BH, Medoff-Cooper B. Comparisons of rectal, femoral, axillary, and skin-to-mattress temperatures in stable neonates. *Nurs Res* 1988;37:162–4.
21. Jirapaet V, Jirapaet K. Comparisons of tympanic membrane, abdominal skin, axillary, and rectal temperature

- measurements in term and preterm neonates. *Nurs Health Sci* 2000;2:1–8.
22. Fulbrook P. Core temperature measurements in adults: a literature review. *J Adv Nurs* 1993;18:1451–60.
  23. Hissink Muller PC, van Berkel LH, de Beaufort AJ. Axillary and rectal temperature measurements poorly agree in newborn infants. *Neonatology* 2008;94:31–4.
  24. Craig JV, Lancaster GA, Williamson PR, *et al.* Temperature measured at the axilla compared with rectum in children and young people: systematic review. *Br Med J* 2000;320:1174–8.
  25. Kemp C. Infrared skin thermometer good alternative for newborns. *AAP News* 2008;29:2.
  26. Can E, Bulbul A, Uslu S, *et al.* Comparison of non-contact infrared forehead thermometer to standard temperature measurement in neonatal intensive care unit patients. *Turk Arch Ped* 2010;45:257–63.
  27. Harasawa K, Kemmotsu O, Mayumi T, *et al.* Comparison of tympanic, esophageal and blood temperatures during mild hypothermic cardiopulmonary bypass: a study using an infrared emission detection tympanic thermometer. *J Clin Monit* 1997;13:19–24.
